# Supplementary material
Source: PubMed Central journal article supplement (PMC4403206)
Supplement: pnas.201422296SI.pdf [file pnas.201422296SI.pdf]

# Supporting Information

Zhang 10.1073/pnas.1422296112

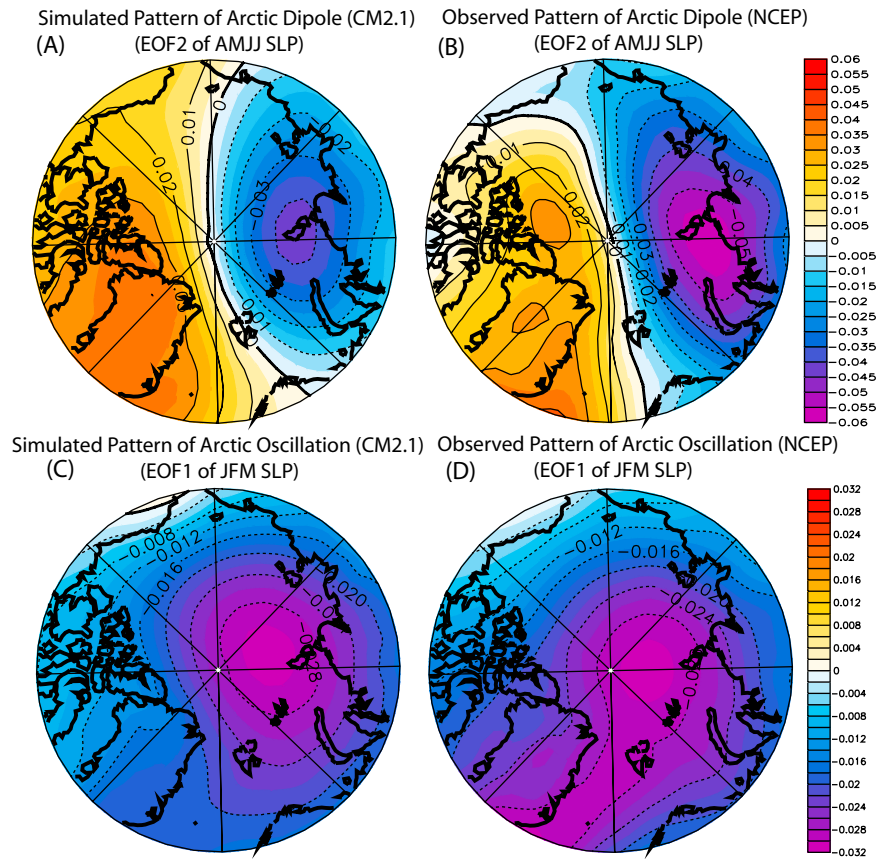

**Fig. S1.** Spatial patterns of simulated (3,600-y segment of CM2.1 control simulation) and observed (NCEP/NCAR reanalysis for 1948–2013) positive phases of spring AD [EOF2 of April–July (AMJJ) SLP anomaly north of Arctic Circle] and winter AO [EOF1 of January–March (JFM) SLP anomaly north of 20°N]. (A) Simulated AD pattern (10% of variance). (B) Observed AD pattern (12% of variance). The AD pattern (EOF2) is dimensionless, and the amplitude of AD is carried by the AD index (PC2). The SDs of simulated and observed unfiltered AD index are 38.5 hPa and 31.7 hPa, respectively. (C) Simulated AO pattern (52% of variance). (D) Observed AO pattern (48% of variance). The AO pattern (EOF1) is dimensionless, and the amplitude of AO is carried by the AO index (PC1). The SDs of simulated and observed unfiltered AO index are 159.7 hPa and 213.8 hPa, respectively.

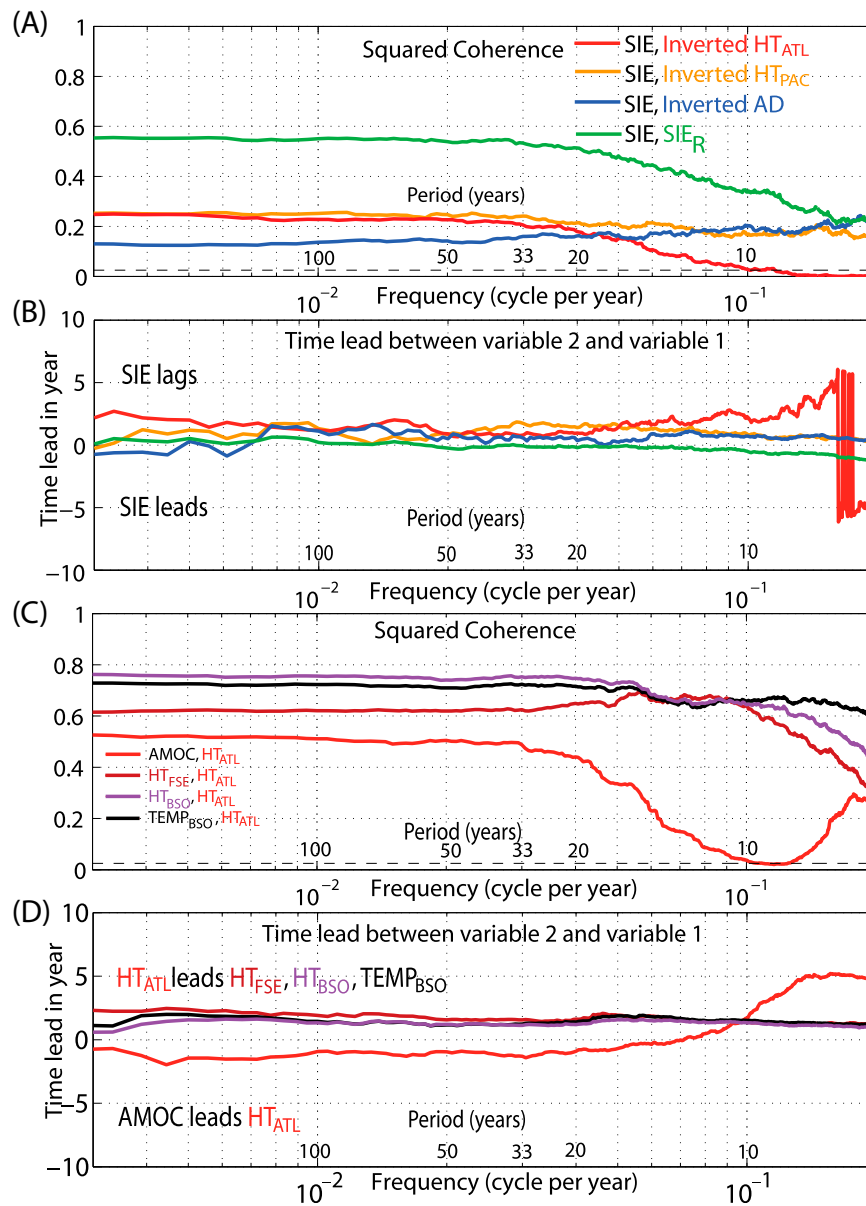

**Fig. S2.** Cross-spectral analysis from CM2.1. (A and B) Squared coherence (A) and time lead in years (B) among unfiltered variables (simulated September Arctic SIE anomalies vs. reconstructed September Arctic SIE anomalies, inverted HT<sub>ATL</sub>, HT<sub>PAC</sub>, and AD anomalies). (C and D) Squared coherence (C) and time lead in years (D) among unfiltered variables [AMOC Index vs. HT<sub>ATL</sub> anomalies; HT<sub>ATL</sub> anomalies vs. anomalous HT<sub>BSO</sub>, HT<sub>FSE</sub>, and TEMP<sub>BSO</sub> (averaged Atlantic Water temperature at 200 m along BSO)]. The dashed black lines in A and C are the 99% significance levels.





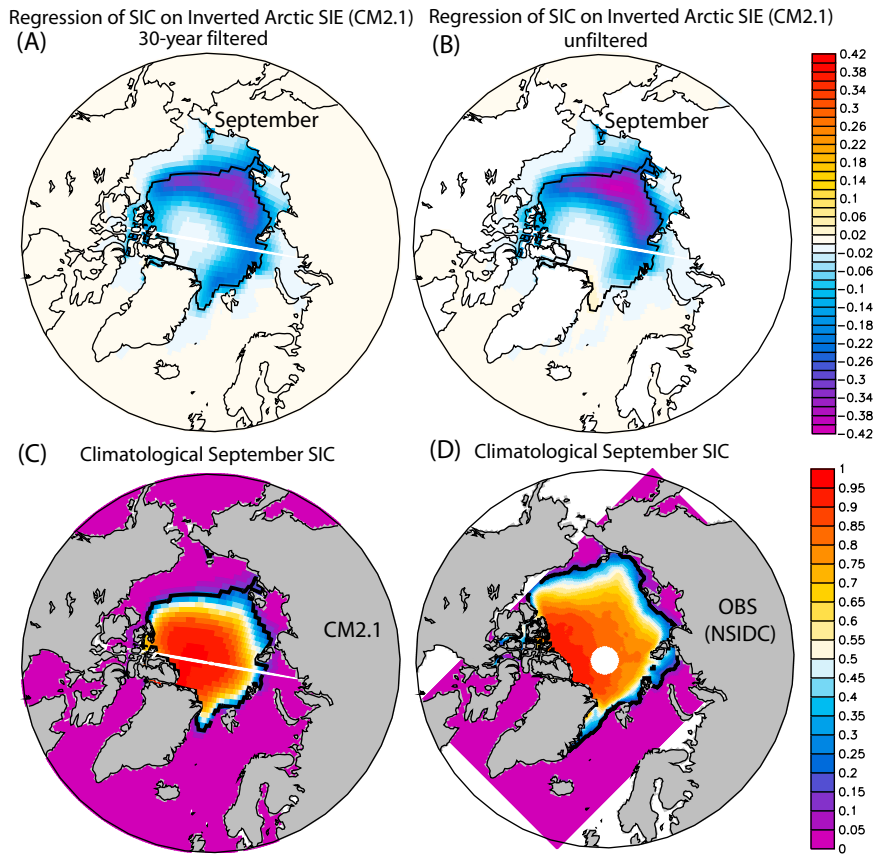

**Fig. S5.** Comparison of 30-y LF and unfiltered patterns of September Arctic SIC anomalies, and comparison of simulated and observed climatological September SIC. (A) Regression of LF anomalous September SIC on 1 million km<sup>2</sup> LF inverted September Arctic SIE anomaly from CM2.1 (B) Regression of unfiltered anomalous September SIC on 1 million km<sup>2</sup> unfiltered inverted September Arctic SIE anomaly from CM2.1. The spatial patterns in A and B are similar except the LF anomalies in A are larger in the Atlantic side and smaller in the Pacific side than those unfiltered anomalies in B. (C) Simulated climatological September SIC from CM2.1. (D) Observed climatological September SIC over 1979–2013 (NSIDC data). The thick black lines mark the positions of climatological September ice edge where climatological September SIC drops below 15%.
